# Supplementary material
Source: PubMed Central journal article supplement (PMC7138210)

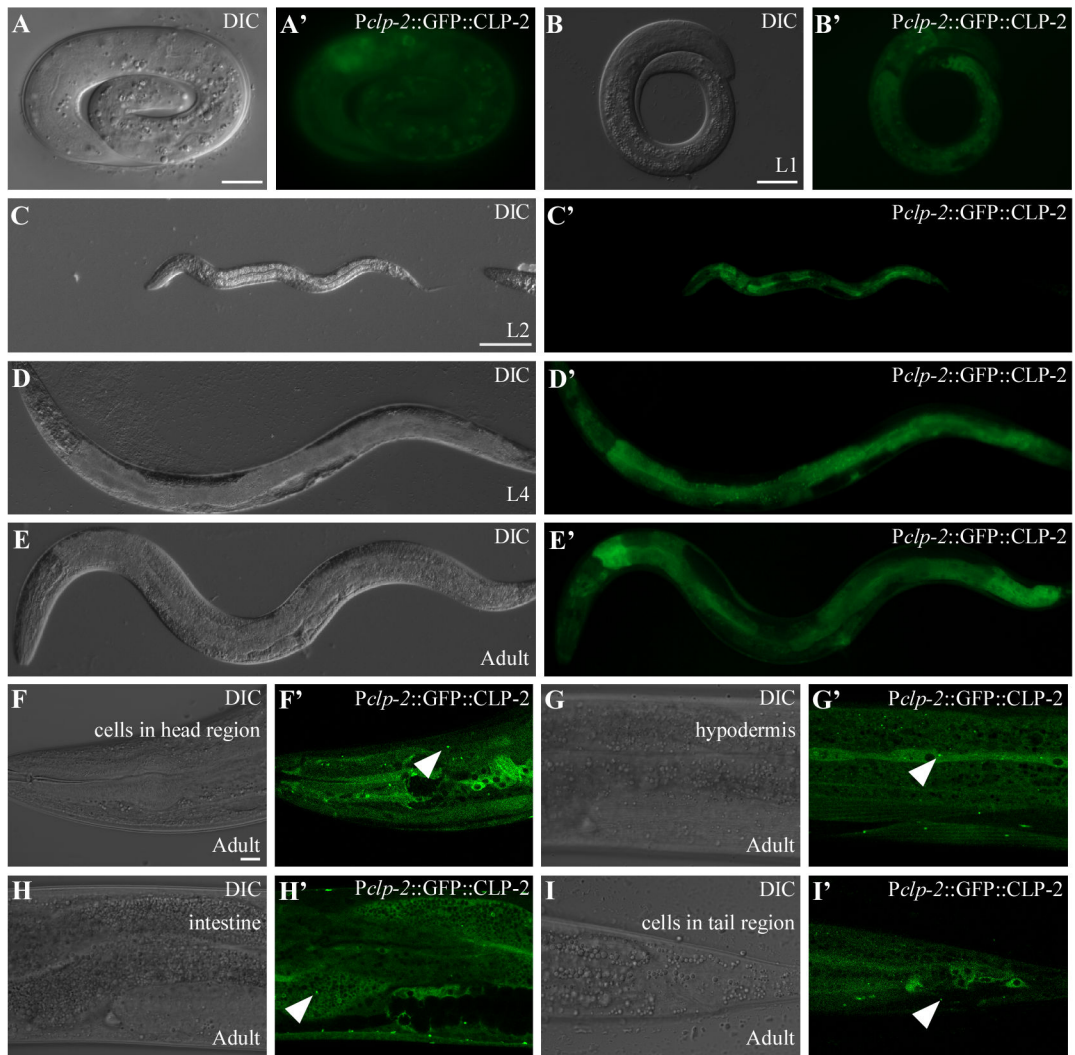

Figure S7

Supplement: kaup-16-04-1632621-s004.pdf [file kaup-16-04-1632621-s004.pdf]

**A**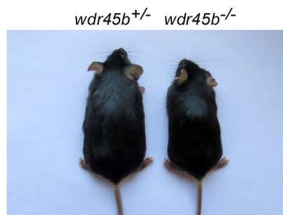**B**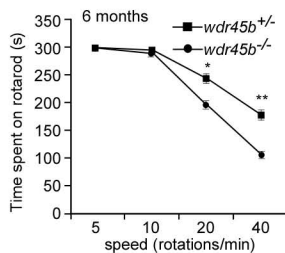**C**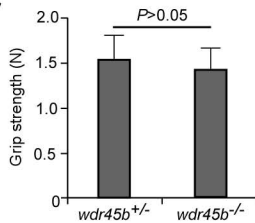**D**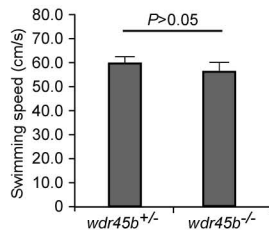**E**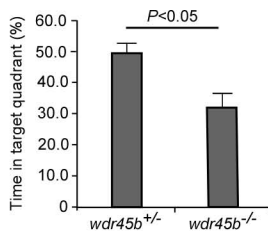**F**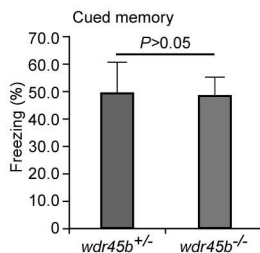**Figure S1**

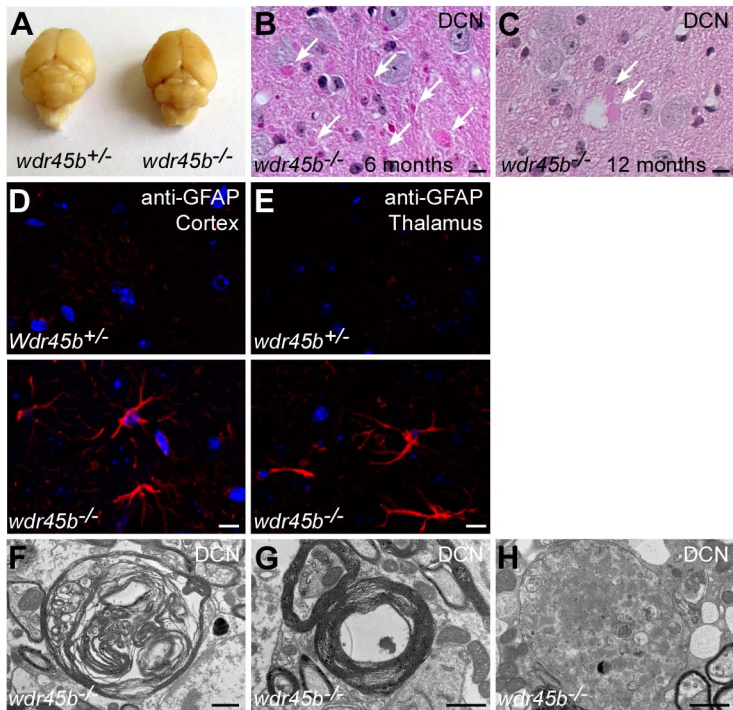

**Figure S2**

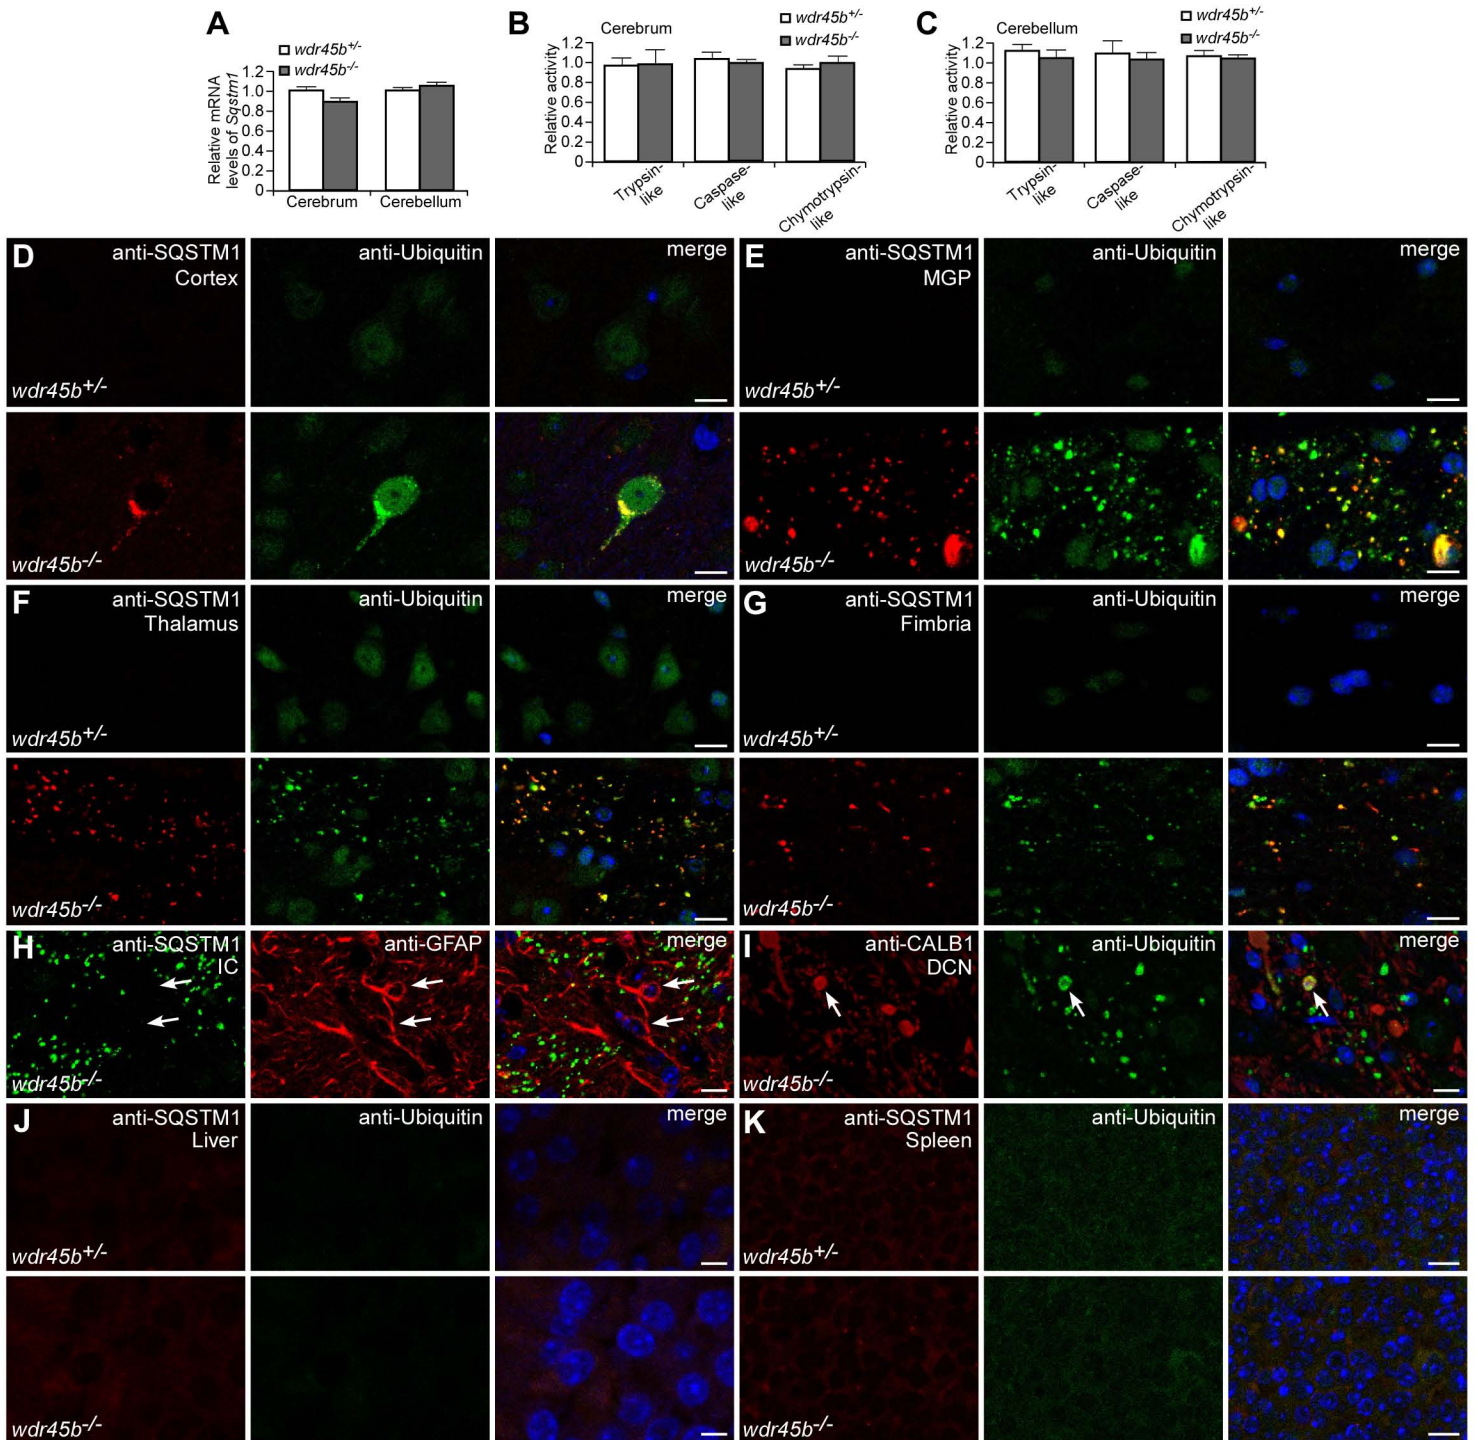

Figure S3



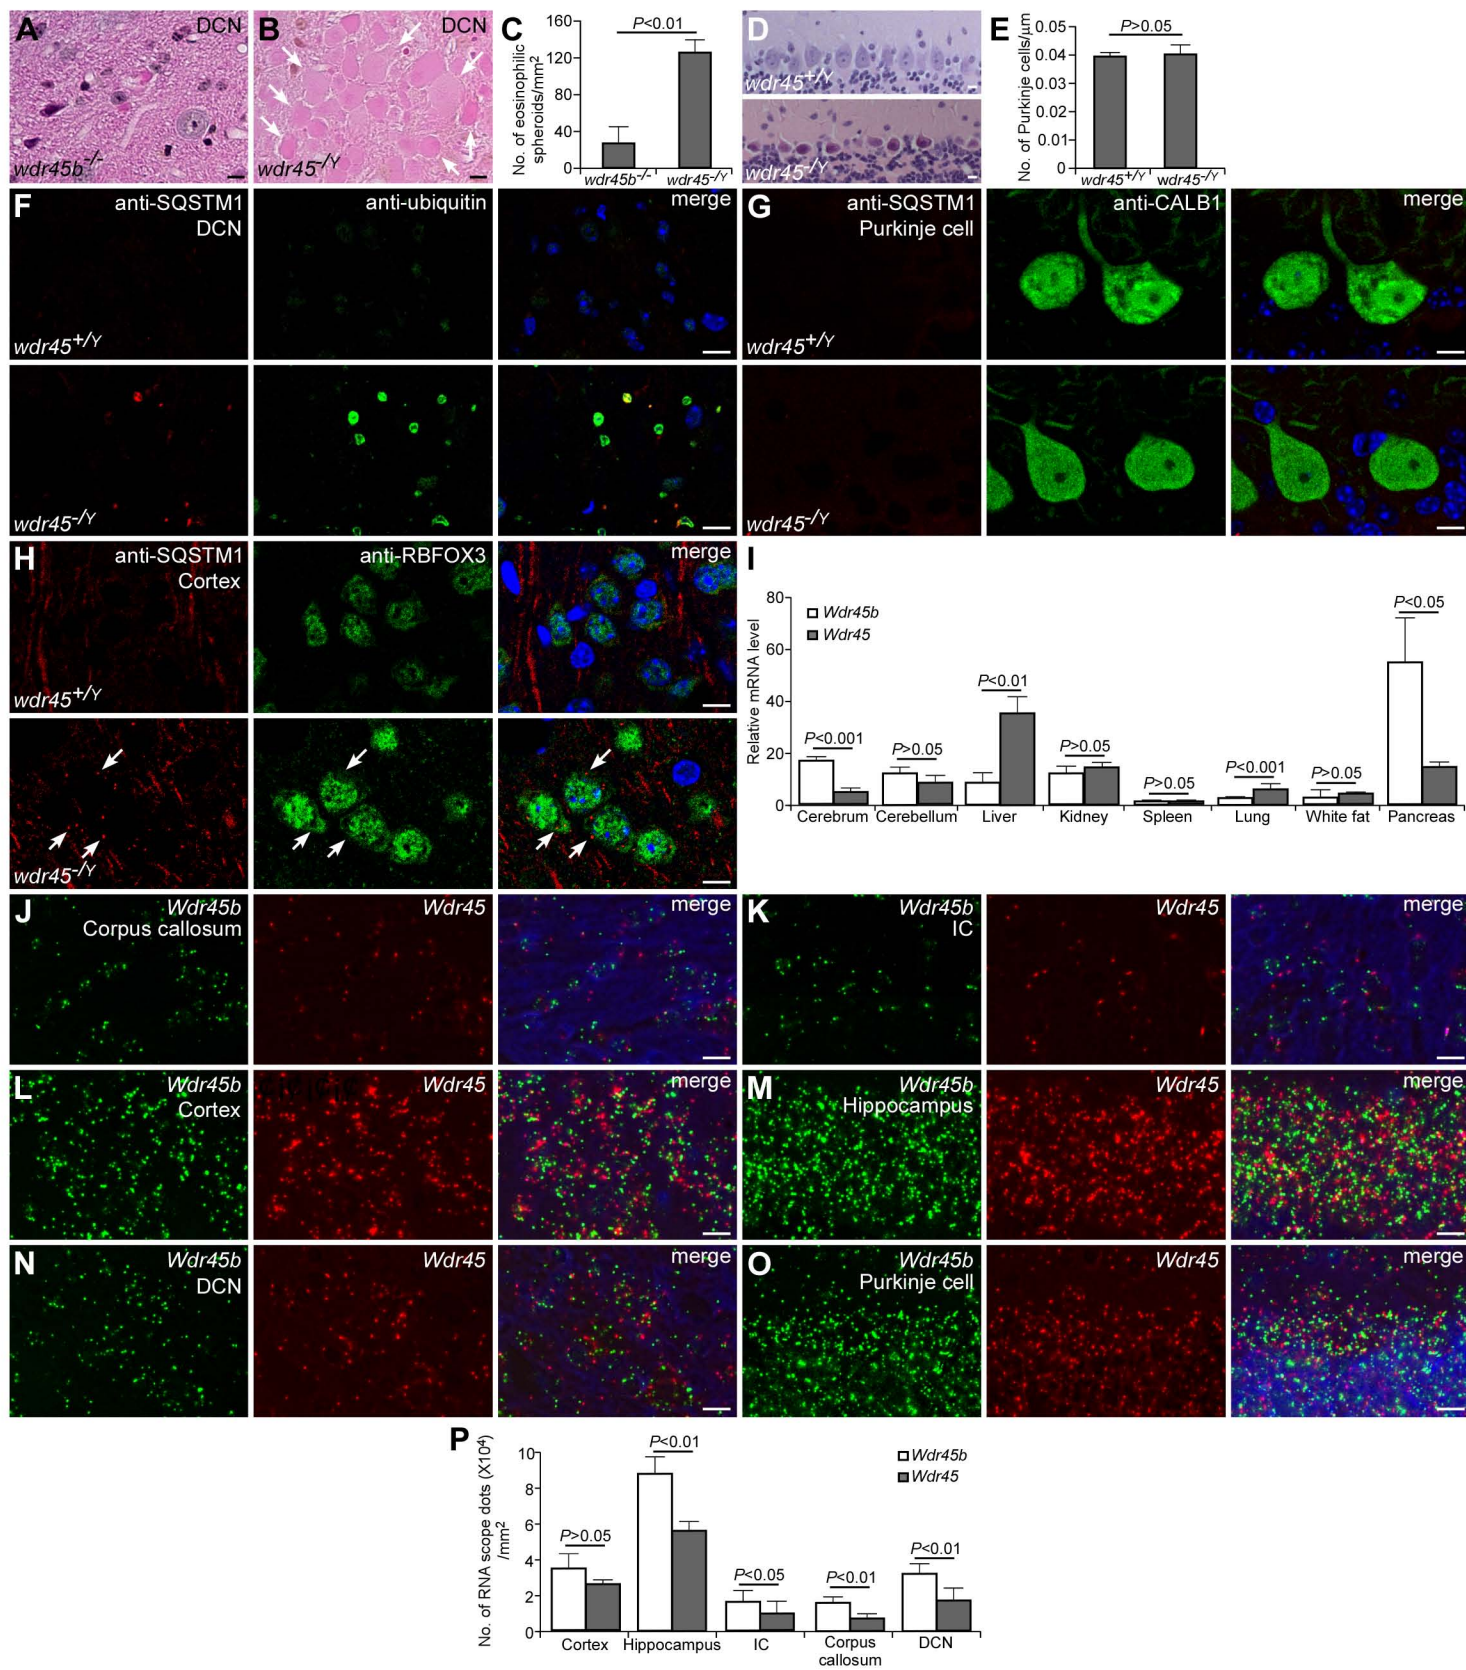

**Figure S4**

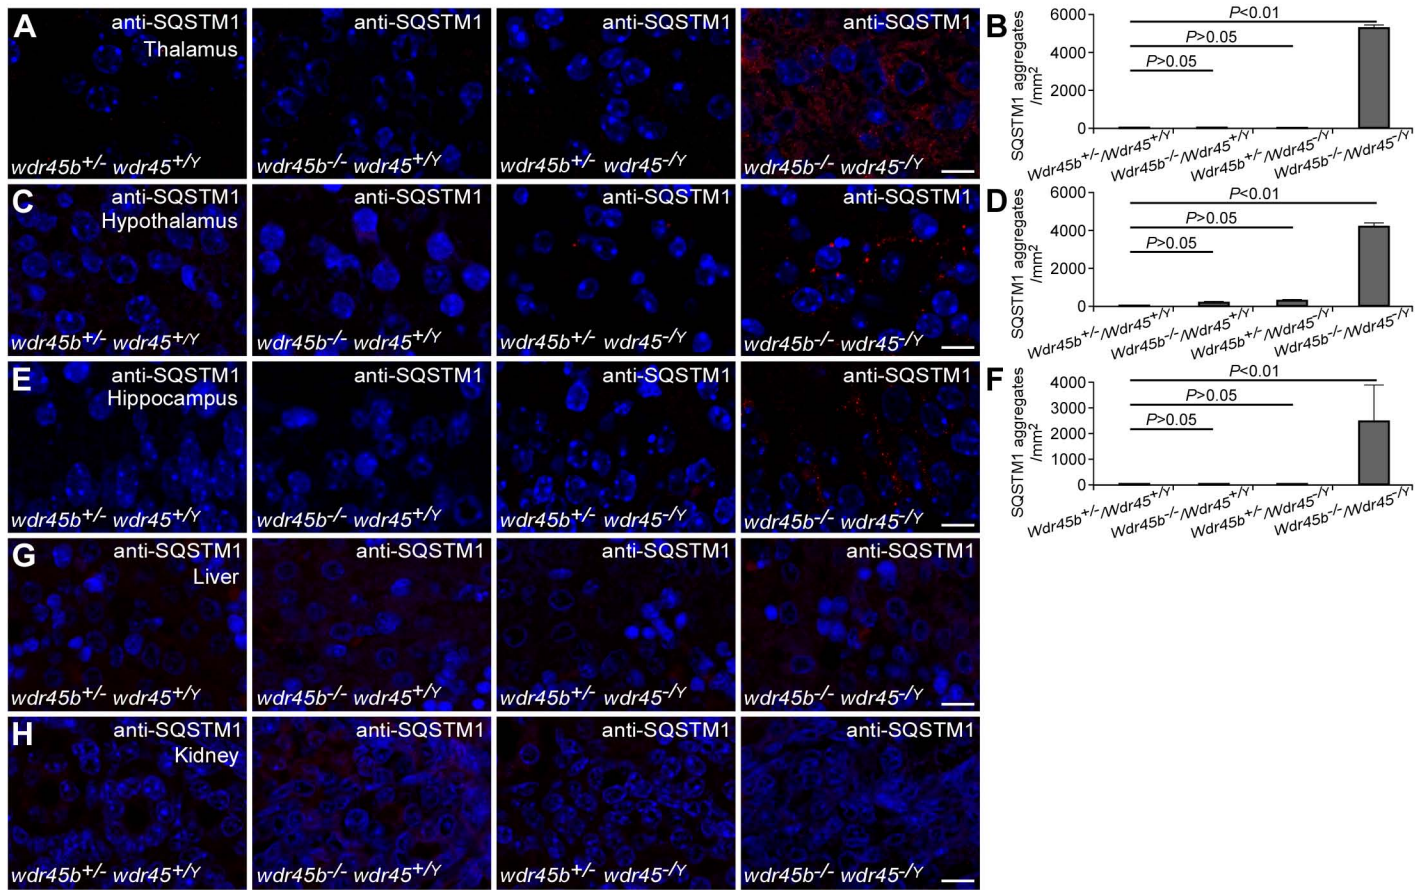

Figure S5

Supplement: kaup-16-04-1632621-s005.pdf [file kaup-16-04-1632621-s005.pdf]
